# Supplementary material for: Hospital-in-the-Home as a Model for Mental Health Care Delivery: A Narrative Review
Source: Atypon-hosted journal article supplement (doi:10.1176/appi.ps.202000763), 2021-06-09

**Table of Search Terms According to Database**

|           |                                                                                                                                                                                                                                              |
|-----------|----------------------------------------------------------------------------------------------------------------------------------------------------------------------------------------------------------------------------------------------|
|           | <b>MEDLINE</b>                                                                                                                                                                                                                               |
| <b>S1</b> | ( hospital-in-the-home OR "hospital in the home" OR HITH OR "hospital at home" OR hospital-at-home OR "hospital-based home care" OR "hospital-level care at home" OR "at home hospital care" ) OR MM home care services, hospital-based      |
| <b>S2</b> | ( psychiatr* OR "mental health care" OR "mental healthcare" OR "mental health service*" OR "mental ill*" OR "mental health" ) OR MM mentally ill persons OR MM ( mental health or mental illness or mental disorder or psychiatric illness ) |
| <b>S3</b> | S1 AND S2                                                                                                                                                                                                                                    |
|           | <b>PsycINFO</b>                                                                                                                                                                                                                              |
| <b>S1</b> | hospital-in-the-home OR "hospital in the home" OR HITH OR hospital-at-home OR "hospital at home" OR "hospital-based home care" OR "at home hospital care"                                                                                    |
| <b>S2</b> | psychia* OR "mental health care" OR "mental healthcare" OR "mental health service*" OR "mental illness" OR "mental health"                                                                                                                   |
| <b>S3</b> | S1 AND S2                                                                                                                                                                                                                                    |
|           | <b>CINAHL</b>                                                                                                                                                                                                                                |
| <b>S1</b> | hospital-in-the-home OR "hospital in the home" OR HITH OR "hospital at home" OR hospital-at-home OR "hospital-based home care" OR "hospital-level care at home" OR "at home hospital care"                                                   |
| <b>S2</b> | ( psychiatr* OR "mental health care" OR "mental healthcare" OR "mental health service*" OR "mental ill*" OR "mental health" ) OR MM mental disorders OR MM psychiatric care                                                                  |
| <b>S3</b> | S1 AND S2                                                                                                                                                                                                                                    |
|           | <b>EMBASE</b>                                                                                                                                                                                                                                |
| <b>S1</b> | "hospital in the home" OR HITH OR "hospital at home"/de OR "hospital at home" OR "hospital-based home care" OR "hospital-level care at home" OR "at home hospital care"                                                                      |
| <b>S2</b> | psychiatr* OR "mental health care" OR "mental healthcare" OR "mental health service*" OR "mental ill*" OR "mental health"                                                                                                                    |
| <b>S3</b> | S1 AND S2                                                                                                                                                                                                                                    |

|           |                                                                                                                                                                                                                                                                                                                                             |
|-----------|---------------------------------------------------------------------------------------------------------------------------------------------------------------------------------------------------------------------------------------------------------------------------------------------------------------------------------------------|
|           | <b>Scopus</b>                                                                                                                                                                                                                                                                                                                               |
| <b>S1</b> | (ALL ( hospital-in-the-home OR "hospital in the home" OR hith OR "hospital at home" OR hospital-at-home OR "hospital-based home care" OR "hospital-level care at home" OR "at home hospital care" ) AND ALL ( psychiatr* OR "mental health care" OR "mental healthcare" OR "mental health service*" OR "mental ill*" OR "mental health" ) ) |
|           | <b>Web of Science Search</b>                                                                                                                                                                                                                                                                                                                |
| <b>S1</b> | All=(hospital-in-the-home OR "hospital in the home" OR HITH OR "hospital at home" OR hospital-at-home OR "hospital-based home care" OR "hospital-level care at home" OR "at home hospital care")                                                                                                                                            |
| <b>S2</b> | All=(psychiatr* OR "mental health care" OR "mental healthcare" OR "mental health service*" OR "mental ill*" OR "mental health")                                                                                                                                                                                                             |
| <b>S3</b> | S1 AND S2                                                                                                                                                                                                                                                                                                                                   |
|           | <b>Google Scholar</b>                                                                                                                                                                                                                                                                                                                       |
| <b>S1</b> | (hospital-in-the-home OR "hospital in the home" OR hith OR "hospital-based home care") AND (psychiatr* OR "mental health care" OR "mental health service*" OR "mental ill*" OR "mental health")                                                                                                                                             |

*Search and Study Inclusion Flow-Chart*

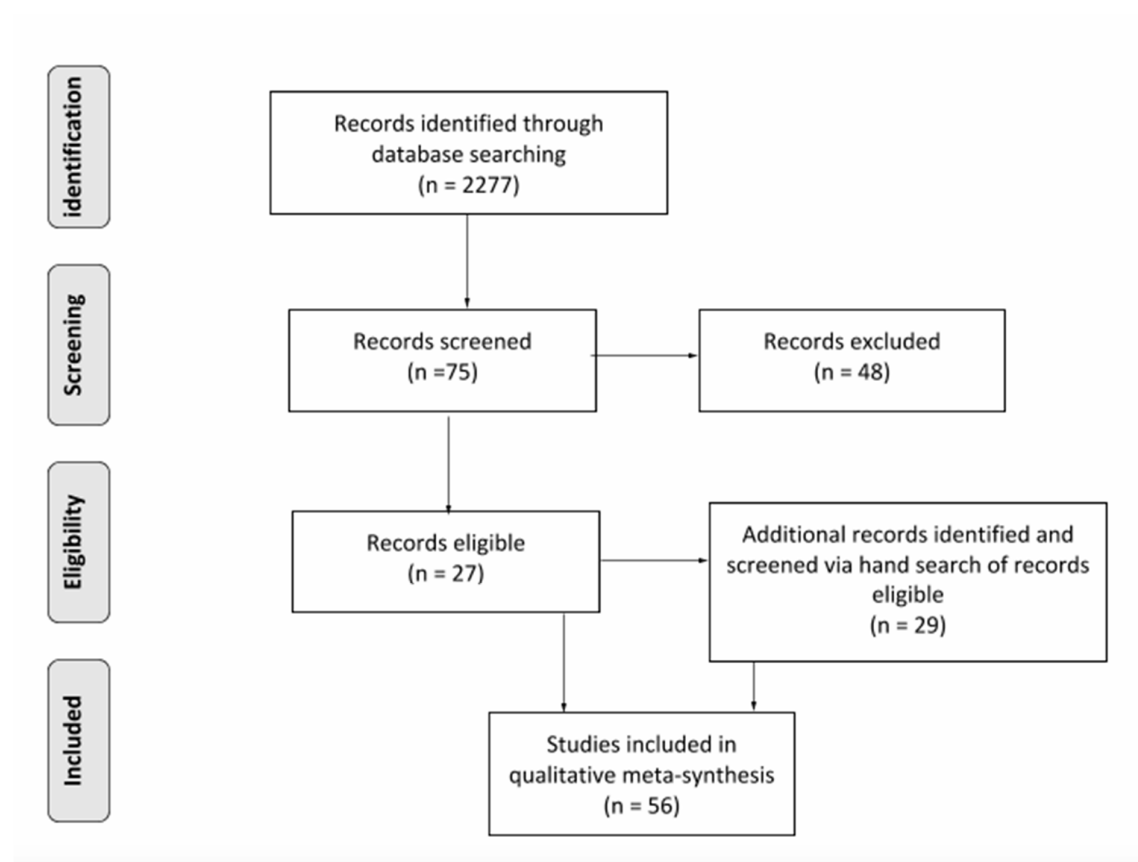

Supplement: appi.ps.202000763.ds001.pdf [file appi.ps.202000763.ds001.pdf]
